# Supplementary material
Source: MDPI journal article supplement (https://www.mdpi.com/2413-8851/3/3/88)
Supplement: s1 [file s1]

**TABLE S2**  
**RESULTS OF THE CORRELATION ANALYSIS**

|        |                  | GIN | IDH    | PIB     | LPO      | LOGPOB  | LOGSUP  | DEN      | VIV      | BAR      | LOGVER   | LOGPUB   |
|--------|------------------|-----|--------|---------|----------|---------|---------|----------|----------|----------|----------|----------|
| GIN    | Pearson          | 1   | -0,062 | 0,077   | -0,089   | 00,302* | 0,282*  | 0,018    | -0,043   | -0,017   | 0,072    | 0,329*   |
|        | Sig. (bilateral) |     | 0,674  | 0,600   | 0,545    | 0,035   | 0,050   | 0,903    | 0,771    | 0,908    | 0,623    | 0,021    |
| IDH    | Pearson          |     | 1      | 0,727** | -0,781** | -0,148  | 0,070   | -0,578** | -0,406** | -0,560** | 0,100    | 0,391**  |
|        | Sig. (bilateral) |     |        | 0,000   | 0,000    | 0,311   | 0,633   | 0,000    | 0,004    | 0,000    | 0,496    | 0,006    |
| PIB    | Pearson          |     |        | 1       | -0,623** | -0,123  | 0,046   | -0,417** | -0,194   | -0,402** | 0,153    | 0,344*   |
|        | Sig. (bilateral) |     |        |         | 0,000    | 0,399   | 0,751   | 0,003    | 0,187    | 0,004    | 0,294    | 0,016    |
| LPO    | Pearson          |     |        |         | 1        | 0,141   | -0,051  | 0,413**  | 0,183    | 0,327*   | -0,185   | -0,360*  |
|        | Sig. (bilateral) |     |        |         |          | 0,334   | 0,726   | 0,003    | 0,213    | 0,022    | 0,202    | 0,011    |
| LOGPOB | Pearson          |     |        |         |          | 1       | 0,904** | -0,034   | 0,092    | 0,143    | -0,236   | -0,090   |
|        | Sig. (bilateral) |     |        |         |          |         | 0,000   | 0,817    | 0,534    | 0,327    | 0,102    | 0,540    |
| LOGSUP | Pearson          |     |        |         |          |         | 1       | -0,400** | -0,021   | -0,038   | -0,205   | 0,006    |
|        | Sig. (bilateral) |     |        |         |          |         |         | 0,004    | 0,886    | 0,798    | 0,158    | 0,966    |
| DEN    | Pearson          |     |        |         |          |         |         | 1        | 0,455**  | 0,518**  | -0,104   | -0,276   |
|        | Sig. (bilateral) |     |        |         |          |         |         |          | 0,001    | 0,000    | 0,478    | 0,055    |
| VIV    | Pearson          |     |        |         |          |         |         |          | 1        | 0,464**  | -0,260   | -0,231   |
|        | Sig. (bilateral) |     |        |         |          |         |         |          |          | 0,001    | 0,074    | 0,114    |
| BAR    | Pearson          |     |        |         |          |         |         |          |          | 1        | -0,464** | -0,678** |
|        | Sig. (bilateral) |     |        |         |          |         |         |          |          |          | 0,001    | 0,000    |
| LOGVER | Pearson          |     |        |         |          |         |         |          |          |          | 1        | 0,699**  |
|        | Sig. (bilateral) |     |        |         |          |         |         |          |          |          |          | 0,000    |
| LOGPUB | Pearson          |     |        |         |          |         |         |          |          |          |          | 1        |
|        | Sig. (bilateral) |     |        |         |          |         |         |          |          |          |          |          |

Note: N = 49

\*. Correlation is significant at 0,05 (bilateral). \*\*. Correlation is significant at 0,01 (bilateral).

### Descriptive statistic of PLA

| Category                                         | N  | Mean  | Standard<br>Deviation | Standard<br>Error | 95% of the confidence<br>interval |             | Min | Max |
|--------------------------------------------------|----|-------|-----------------------|-------------------|-----------------------------------|-------------|-----|-----|
|                                                  |    |       |                       |                   | Lower limit                       | Upper limit |     |     |
| Plan exists and it is enforced                   | 18 | ,4330 | ,07056                | ,01663            | ,3980                             | ,4681       | ,32 | ,56 |
| Plan exists but it it not enforced               | 21 | ,5043 | ,06612                | ,01443            | ,4742                             | ,5344       | ,38 | ,63 |
| Plan does not exist or is more than 10 years old | 10 | ,5325 | ,08921                | ,02821            | ,4686                             | ,5963       | ,42 | ,68 |
|                                                  | 49 | ,4839 | ,08198                | ,01171            | ,4603                             | ,5074       | ,32 | ,68 |

### One-way ANOVA

| PLA-GIN        |                |     |                |       |      |
|----------------|----------------|-----|----------------|-------|------|
|                | Sum of squares | dof | Quadratic mean | F     | Sig. |
| Between groups | ,079           | 2   | ,039           | 7,443 | ,002 |
| Inside groups  | ,244           | 46  | ,005           |       |      |
|                | ,323           | 48  |                |       |      |
